# Supplementary material for: A Pt3 cluster anchored on a C2N monolayer as an efficient catalyst for electrochemical reduction of nitrobenzene to aniline: a computational study
Source: Royal Society of Chemistry journal article supplement (doi:10.1039/d1nj04285h), 2021-01-01
Supplement: d1nj04285h1.pdf [file d1nj04285h1.pdf]

## Supporting Information

**Pt<sub>3</sub> Cluster Anchored on C<sub>2</sub>N Monolayer as an Efficient Catalyst for  
Electrochemical Reduction of Nitrobenzene to Aniline: a Computational Study**

**Pt<sub>3</sub> Cluster Anchored on C<sub>2</sub>N Monolayer as an Efficient Catalyst for  
Electrochemical Reduction of Nitrobenzene to Aniline: a Computational Study**

Shuang Wang,<sup>a</sup> Zhangxu Wang,<sup>a</sup> Yongchen Shang,<sup>a</sup> Yu Tian,<sup>b,\*</sup> Qinghai Cai,<sup>a,d</sup>

Zhenxing Li,<sup>c,\*</sup> Jingxiang Zhao<sup>a,\*</sup>

<sup>a</sup> College of Chemistry and Chemical Engineering, Key Laboratory of Photonic and Electronic Bandgap Materials, Ministry of Education, Harbin Normal University, Harbin, 150025, China

<sup>b</sup> Institute for Interdisciplinary Quantum Information Technology, Jilin Engineering Normal University, Changchun 130052, China

<sup>c</sup> Information Center, Harbin Normal University, Harbin, 150025, China

<sup>d</sup> Heilongjiang Province Collaborative Innovation Center of Cold Region Ecological Safety, Harbin 150025, China

\* To whom correspondence should be addressed. Email: tiany516@nenu.edu.cn (Y.

T.); lzx@hrbnu.edu.cn (ZL) ; zhaojingxiang@hrbnu.edu.cn (JZ)

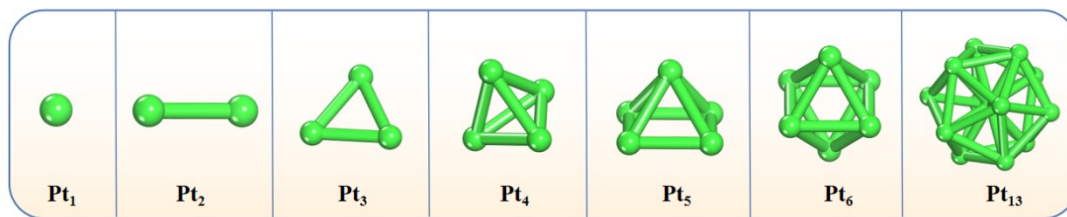

**Fig. S1** The optimized models of the Pt<sub>n</sub> (n = 1~6, 13) clusters.

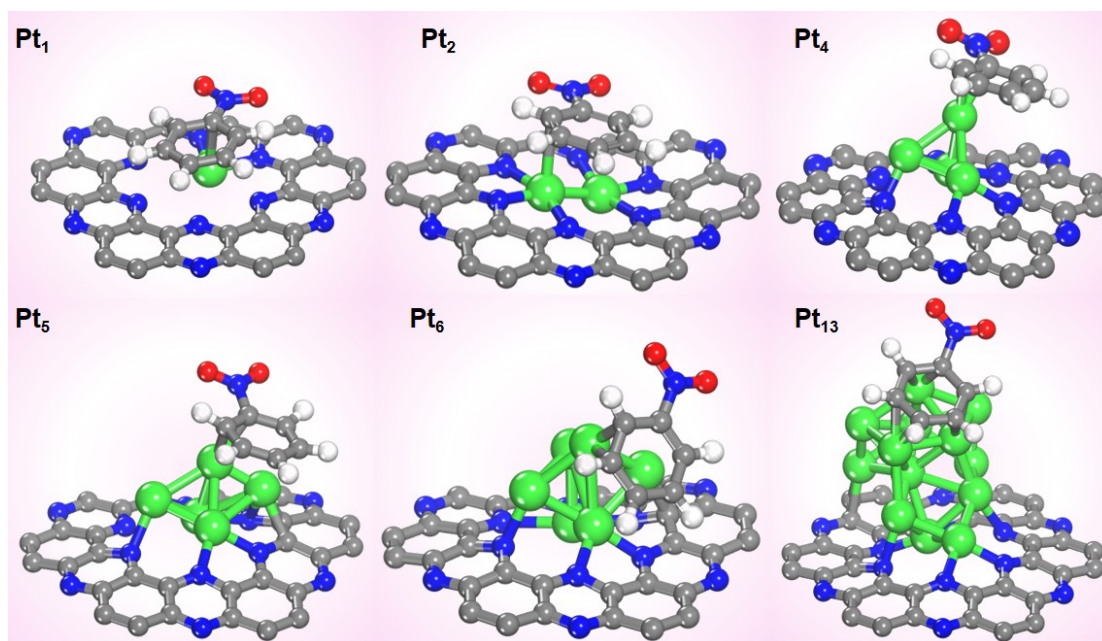

**Fig. S2** The most stable adsorption configurations of Ph-NO<sub>2</sub> on the surface of Pt<sub>n</sub>/C<sub>2</sub>N (Pt<sub>n</sub>, n = 1, 2, 4~6 and 13). The green, blue, red and gray balls represent Pt, N, O and C atoms, respectively.

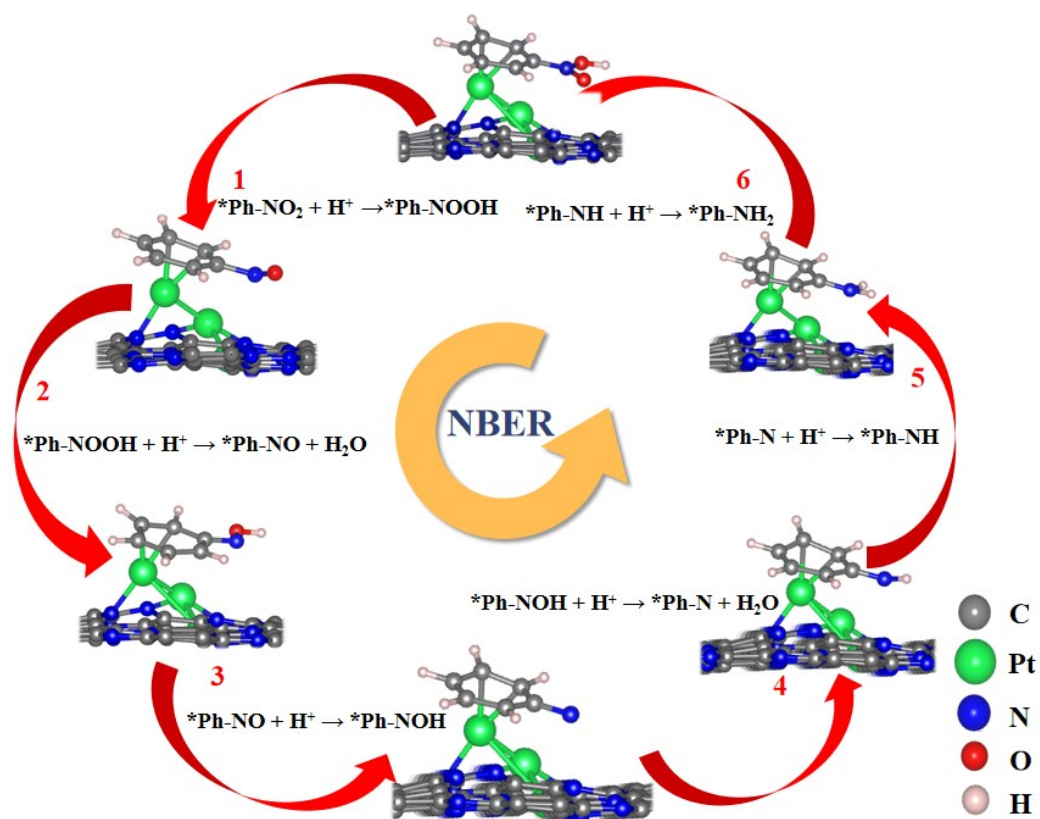

**Fig. S3** The optimal path and intermediates involved in the electroreduction of Ph-NO<sub>2</sub> to Ph-NH<sub>2</sub> on the surface of Pt<sub>3</sub>/C<sub>2</sub>N: Ph-NOOH\*, Ph-NO\*, Ph-NOH\*, Ph-N\*, Ph-NH\*, and Ph-NH<sub>2</sub>\*.
